# Supplementary material
Source: PubMed Central journal article supplement (PMC8223586)

d

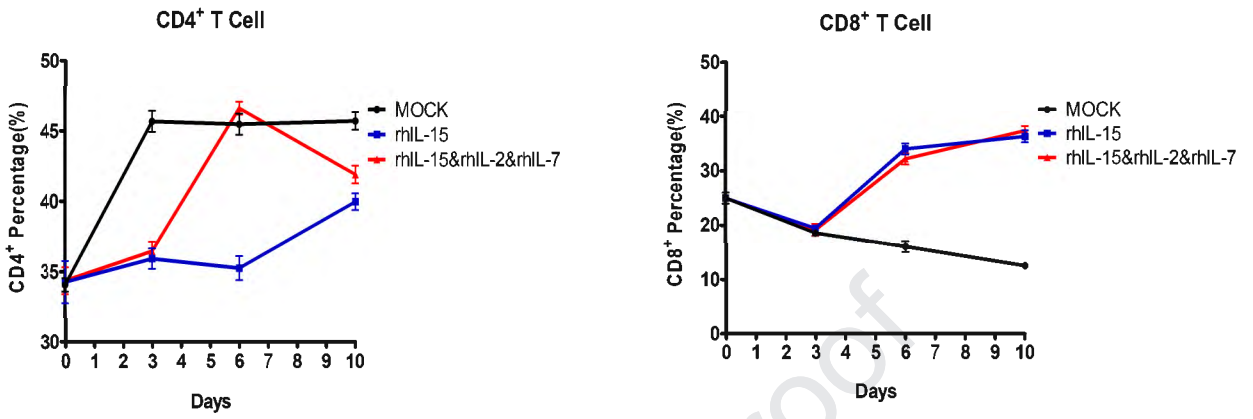

e

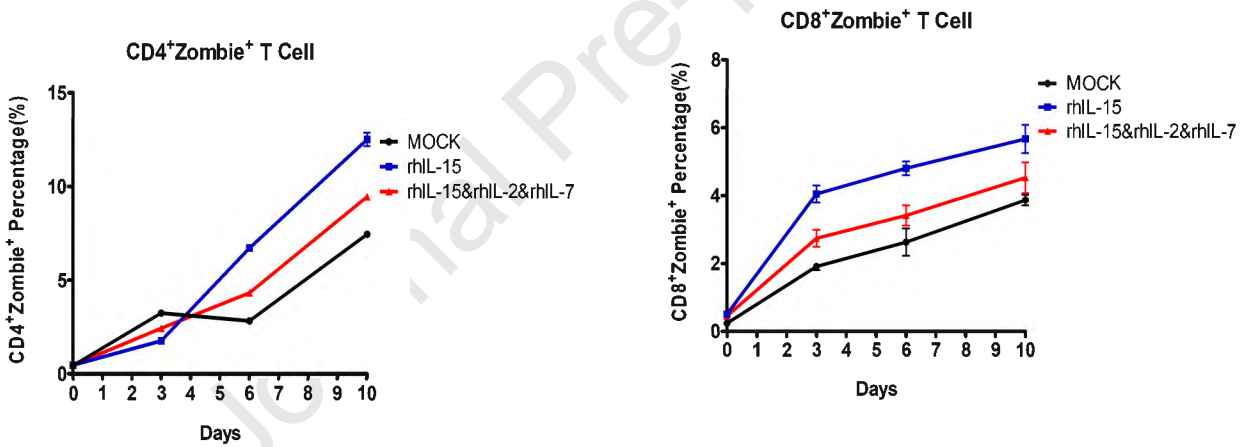

C

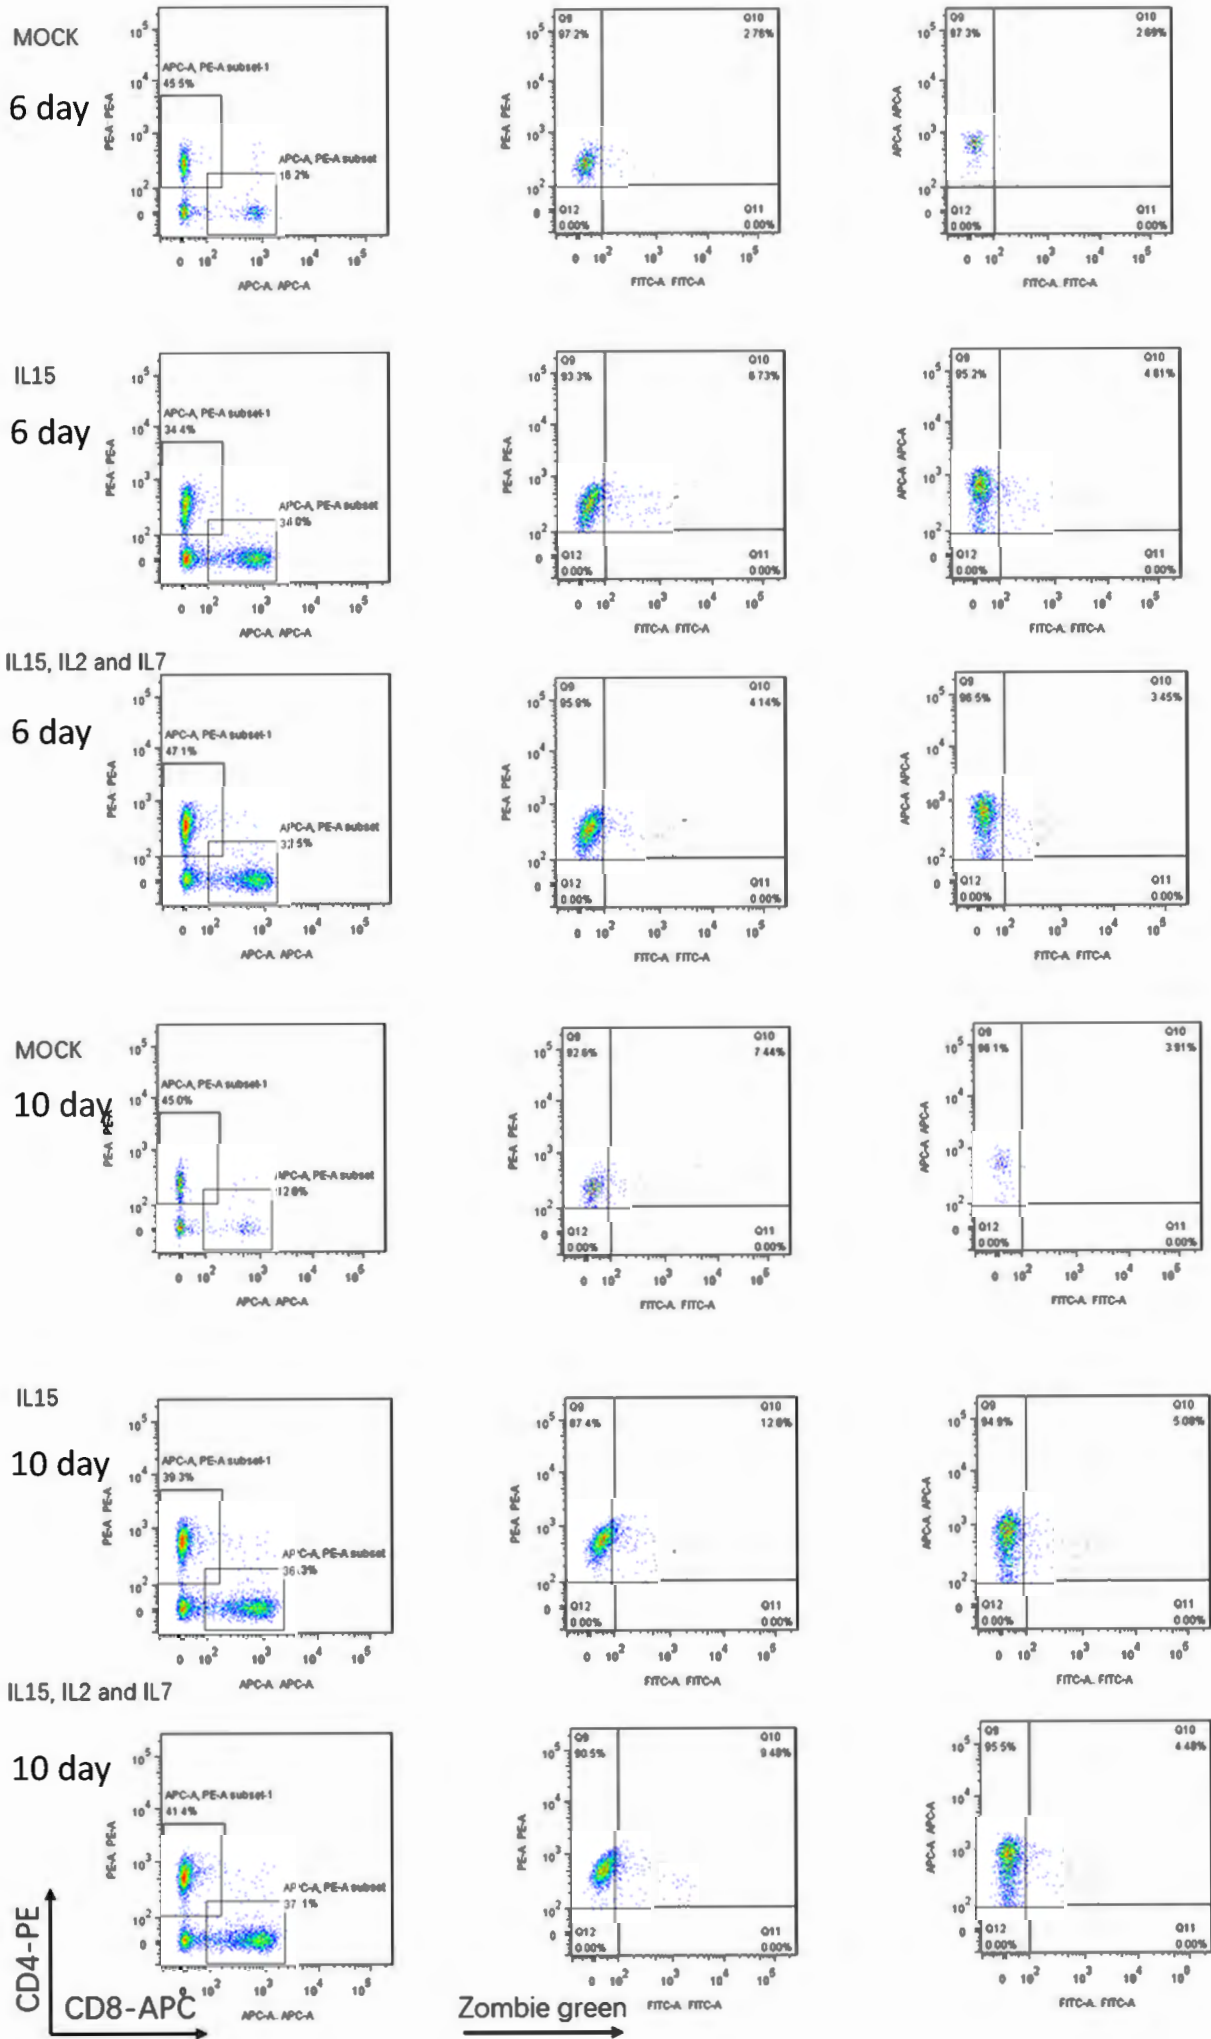

Figure S2.

a

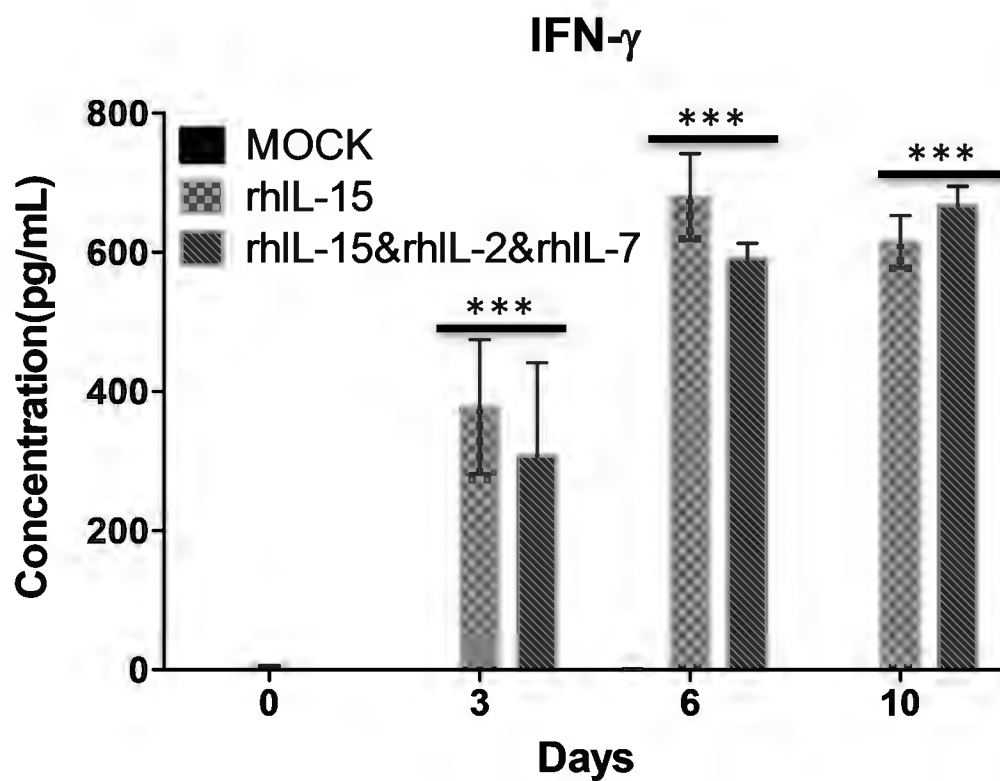

b

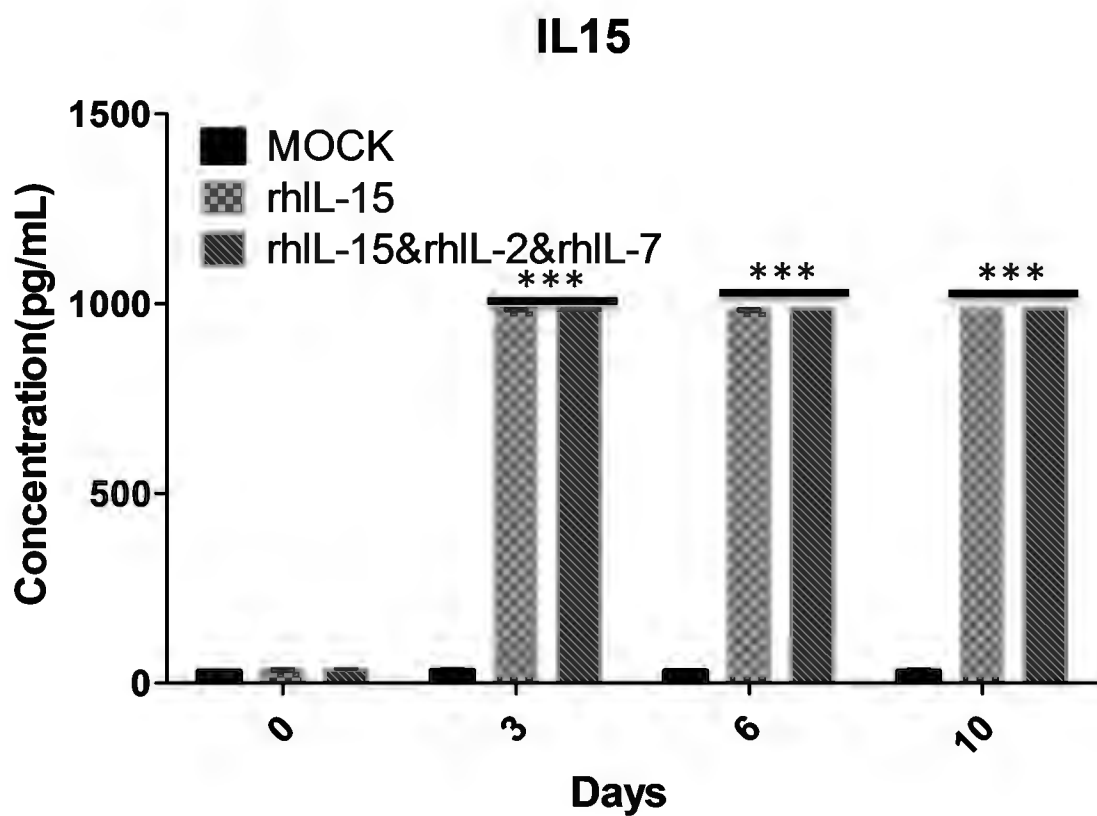

c

### IL-2

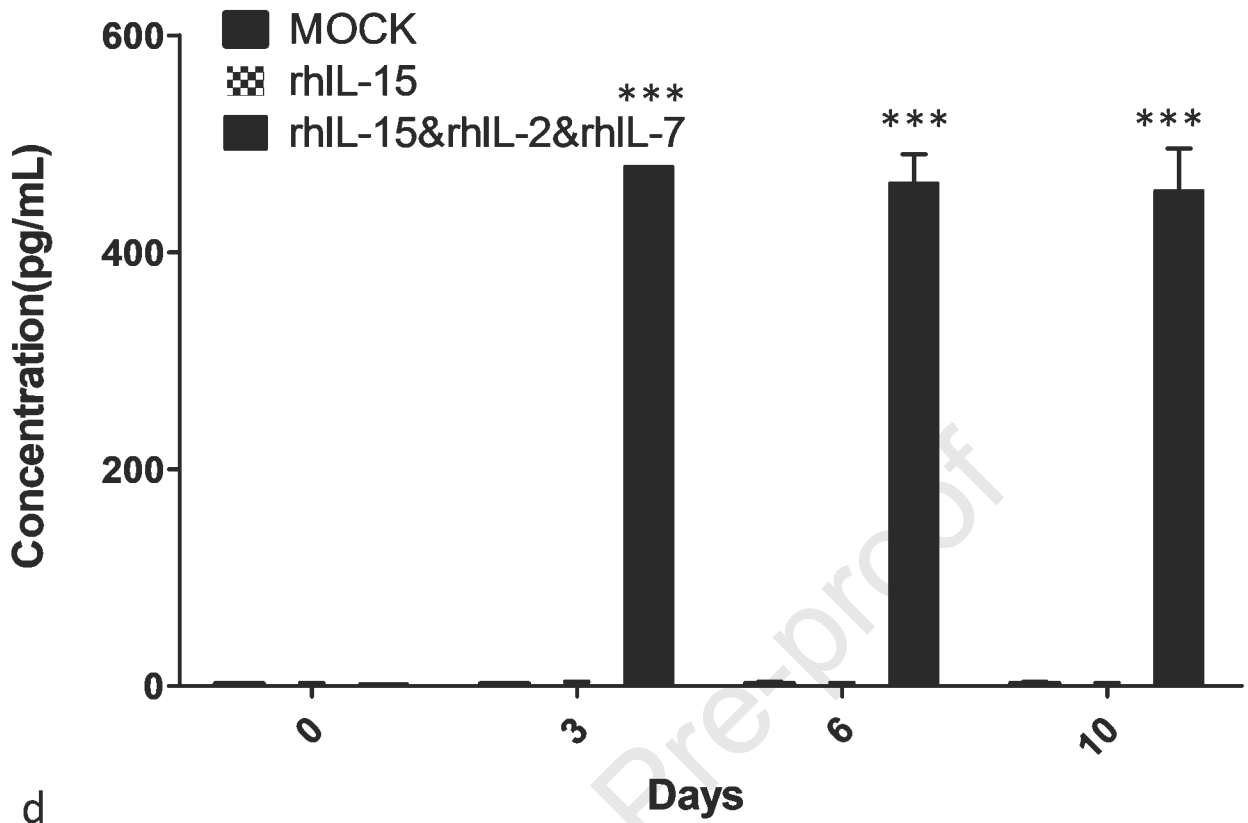

d

### IL-7

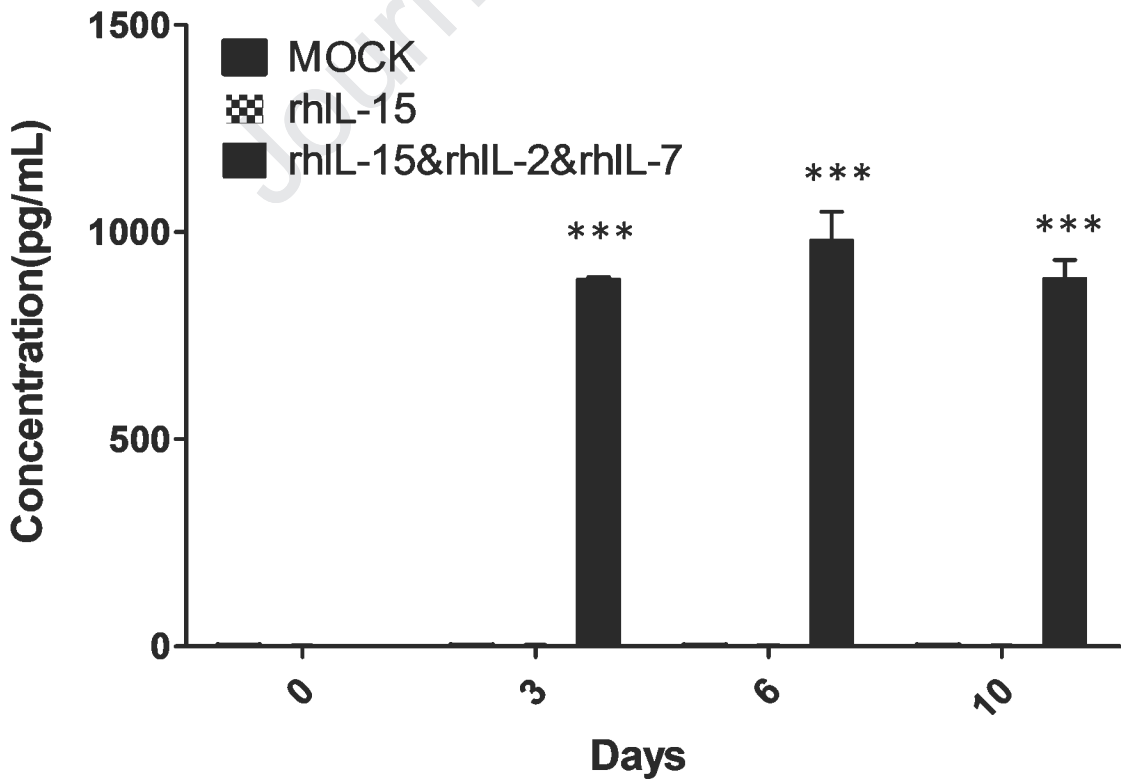

e

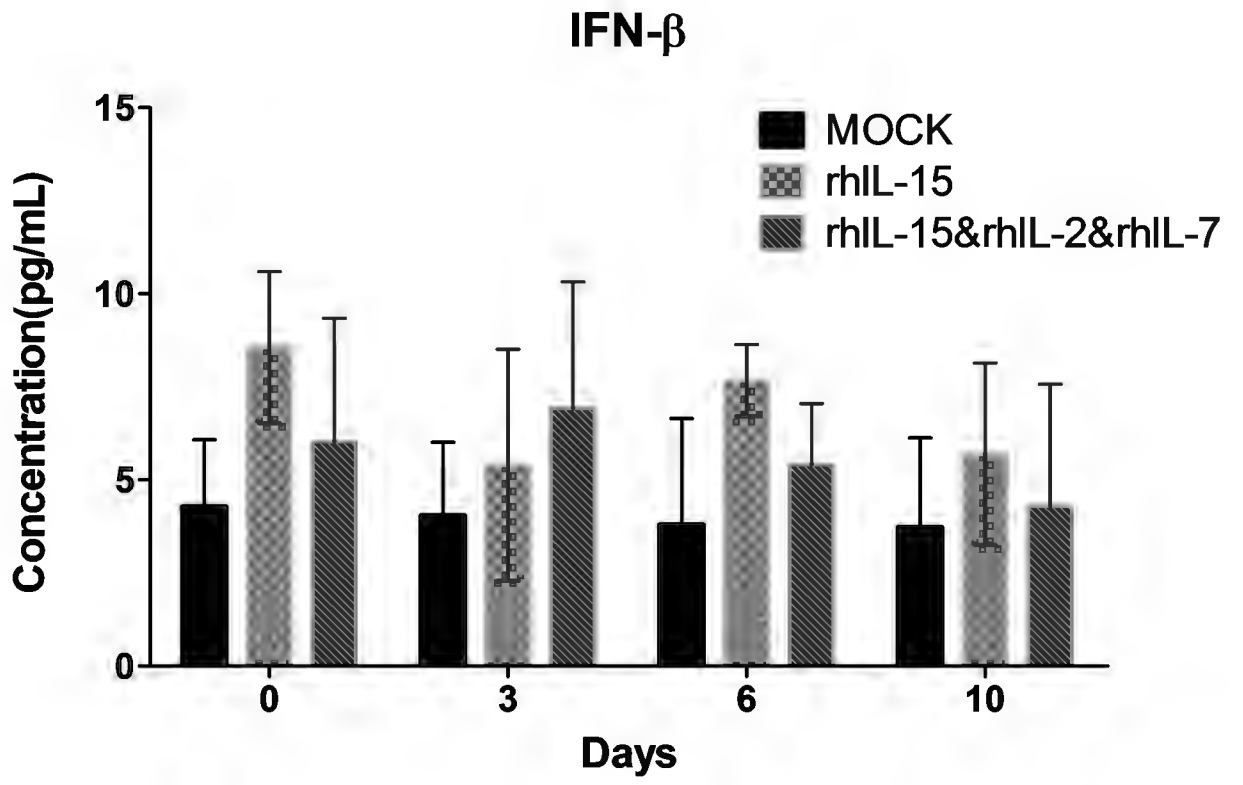

Figure S3.

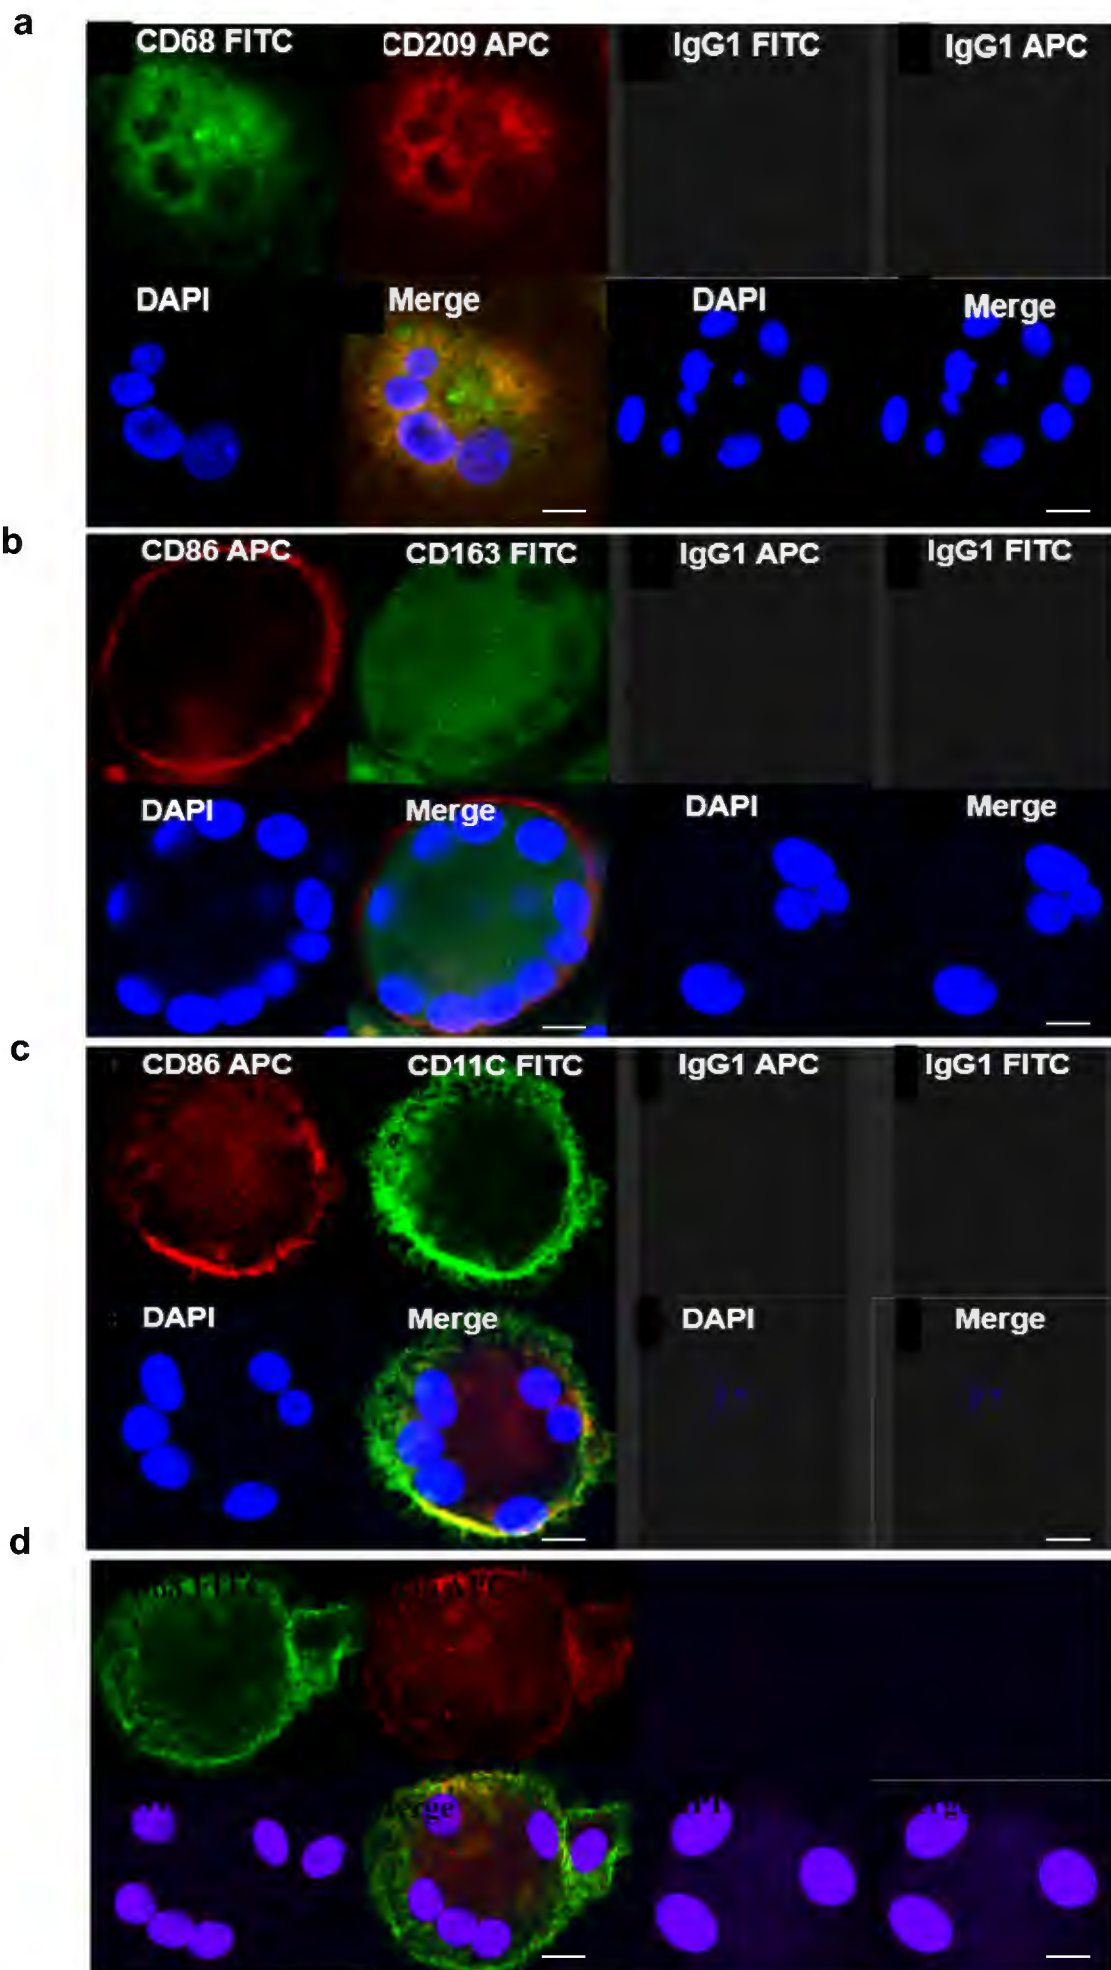



Figure S4

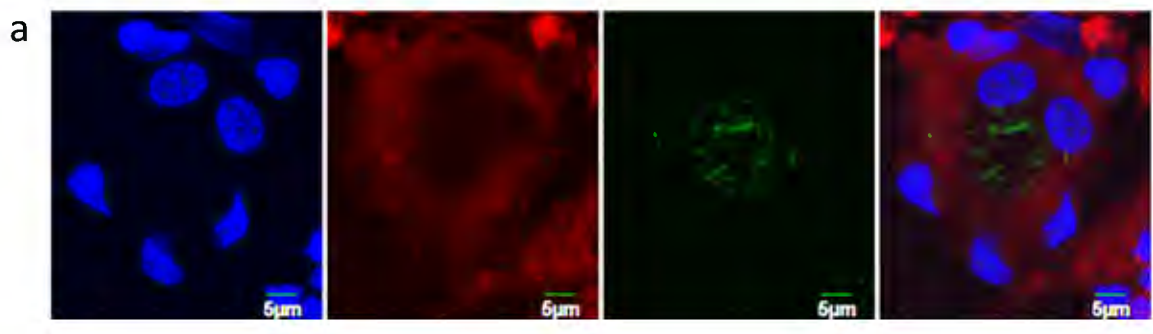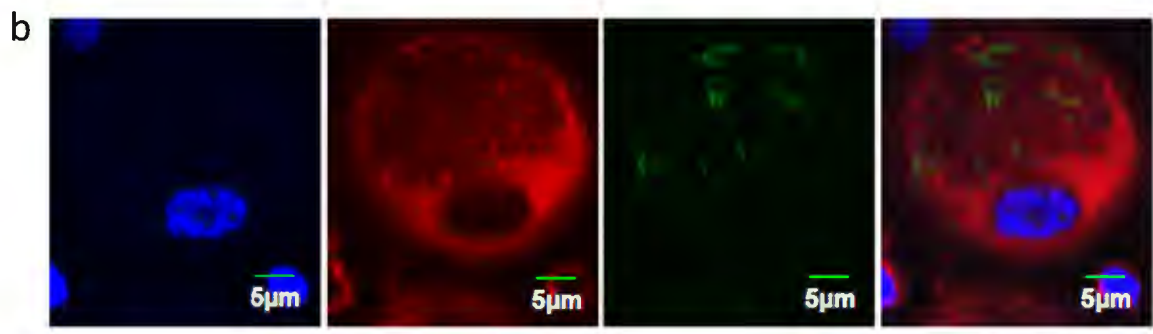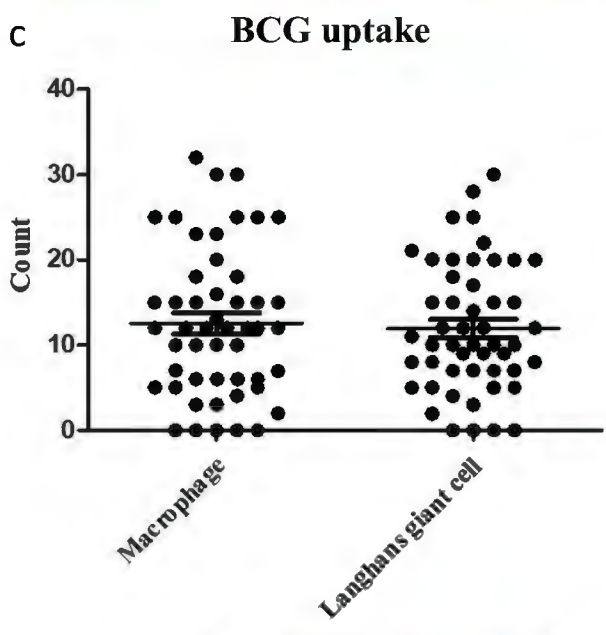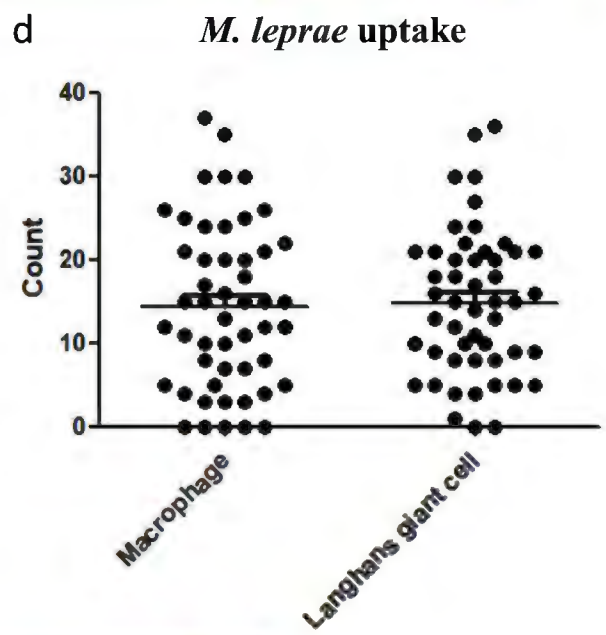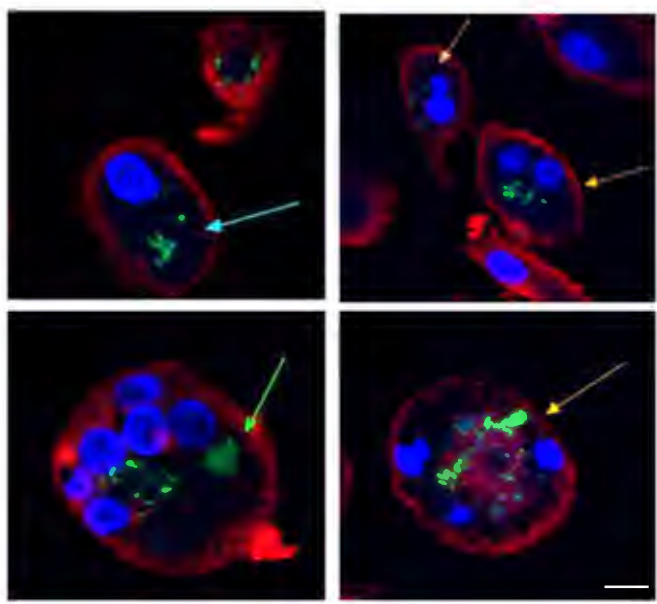

Supplement: NIHMS1711022-supplement-3.pdf [file NIHMS1711022-supplement-3.pdf]
